# Supplementary material
Source: publisher figshare collection journal article supplement (https://sage.figshare.com/ndownloader/files/17830070)
Supplement: Supplementary file 1 [file 17830070]

**Supplementary Table 1. Mortality numbers from the general population of the State of Rio de Janeiro, Brazil, 2006-2018 <sup>a</sup>**

| Cause of death                                                                                      | ICD-10 code                                                                                | Death numbers |            |           |
|-----------------------------------------------------------------------------------------------------|--------------------------------------------------------------------------------------------|---------------|------------|-----------|
|                                                                                                     |                                                                                            | at 1-19 y     | at 20-59 y | at ≥ 60 y |
| Infectious diseases                                                                                 | A00-B99, G00-G02, G04.2, G05.0-G05.2, G06-G08, I33, J00-J22, L00-L08, M00, M01, M86, N39.0 | 8658          | 118928     | 417103    |
| Circulatory system diseases                                                                         | I00-I32, I34-I99                                                                           | 2752          | 151103     | 559581    |
| Respiratory system diseases                                                                         | J30-J99                                                                                    | 5274          | 106039     | 327348    |
| Genitourinary system diseases                                                                       | N00-N37, N39.1-N99                                                                         | 1162          | 35319      | 117879    |
| Endocrine, nutritional and metabolic diseases                                                       | E00-E90                                                                                    | 1297          | 50823      | 186471    |
| Diseases of the blood and blood-forming organs and certain disorders involving the immune mechanism | D50-D89                                                                                    | 1623          | 13640      | 28878     |
| Digestive system diseases                                                                           | K00-K93                                                                                    | 1138          | 42609      | 86347     |
| <b>Total</b>                                                                                        | -                                                                                          | 40689         | 478806     | 1108920   |

<sup>a</sup> Causes of mortality then reported on any line of the death certificates.

ICD-10: international Classification of Diseases, tenth revision.
